# Supplementary material for: Retinal Nerve Fiber Layer and Optic Nerve Head Parameters in a Healthy Iranian Population: A Spectral-Domain Optical Coherence Tomography Study
Source: Research Square preprint supplement (doi:10.21203/rs.3.rs-8401398/v1), 2026-01-13
Supplement: Supplementary file 1 [file 6cfb975aa47beca517e096c7.docx]

Supplementary tables

Table S1. Summary of Outlier Detection Across Retinal Nerve Fiber Layer and Optic Nerve Head Parameters

| Variable | Method | Number of Outliers | Min.Outlier | Max.Outlier |
| --- | --- | --- | --- | --- |
| DiscArea_1 | Horn | 4 | 3.130 | 3.720 |
| Area_C_D_ratio_1 | Adjusted Tukey | 0 | NA | NA |
| H_C_D_ratio_1 | Adjusted Tukey | 0 | NA | NA |
| V_C_D_ratio_1 | Adjusted Tukey | 0 | NA | NA |
| CupArea_1 | Adjusted Tukey | 1 | 2.230 | 2.230 |
| RimArea_1 | Adjusted Tukey | 1 | 0.220 | 0.220 |
| RimVolume_1 | Adjusted Tukey | 0 | NA | NA |
| Nervehead_Volume_1 | Adjusted Tukey | 1 | 0.007 | 0.007 |
| CupVolume_1 | Adjusted Tukey | 4 | 0.772 | 1.038 |
| Avg_RNFL_1 | Adjusted Tukey | 1 | 56.950 | 56.950 |
| Sup_RNFL_1 | Adjusted Tukey | 1 | 53.280 | 53.280 |
| Inf_RNFL_1 | Adjusted Tukey | 0 | NA | NA |
| Tempo_1 | Adjusted Tukey | 1 | 124.950 | 124.950 |
| Superior_1 | Adjusted Tukey | 1 | 55.950 | 55.950 |
| Nasal_1 | Adjusted Tukey | 0 | NA | NA |
| Inferior_1 | Adjusted Tukey | 0 | NA | NA |
| RNFL_TU_1 | Horn | 4 | 56.874 | 129.779 |
| ST_1 | Adjusted Tukey | 1 | 63.950 | 63.950 |
| SN_1 | Adjusted Tukey | 0 | NA | NA |
| NU_1 | Tukey | 8 | 44.426 | 119.734 |
| NL_1 | Horn | 1 | 52.851 | 52.851 |
| IN_1 | Tukey | 5 | 55.760 | 167.353 |
| IT_1 | Adjusted Tukey | 0 | NA | NA |
| TL_1 | Adjusted Tukey | 1 | 39.338 | 39.338 |
| TU1_1 | Adjusted Tukey | 0 | NA | NA |
| TU2_1 | Horn | 10 | 53.871 | 160.090 |
| ST2_1 | Tukey | 3 | 56.050 | 77.539 |
| ST1_1 | Adjusted Tukey | 0 | NA | NA |
| SN1_1 | Tukey | 8 | 55.882 | 183.470 |
| SN2_1 | Adjusted Tukey | 0 | NA | NA |
| NU2_1 | Tukey | 4 | 44.880 | 136.921 |
| NU1_1 | Horn | 1 | 48.587 | 48.587 |
| NL1_1 | Horn | 1 | 48.503 | 48.503 |
| NL2_1 | Horn | 2 | 54.175 | 123.725 |
| IN2_1 | Horn | 2 | 54.539 | 59.817 |
| IN1_1 | Tukey | 5 | 56.960 | 188.428 |
| IT1_1 | Adjusted Tukey | 0 | NA | NA |
| IT2_1 | Tukey | 5 | 61.664 | 205.816 |
| TL2_1 | Adjusted Tukey | 0 | NA | NA |
| TL1_1 | Adjusted Tukey | 2 | 33.397 | 35.235 |

Table S2 Spearman Correlation between R_CIOP and Retinal Nerve Fiber Layer and Optic Nerve Head Parameters

| Variable | Spearman_rho | p_value | n |
| --- | --- | --- | --- |
| DiscArea_1 | -0.0526 | 0.2955 | 398 |
| Area_C_D_ratio_1 | 0.0249 | 0.6182 | 402 |
| H_C_D_ratio_1 | 0.0179 | 0.7201 | 402 |
| V_C_D_ratio_1 | 0.0426 | 0.3942 | 402 |
| CupArea_1 | 0.0301 | 0.5472 | 401 |
| RimArea_1 | -0.0357 | 0.4765 | 401 |
| RimVolume_1 | -0.0126 | 0.8017 | 402 |
| Nervehead_Volume_1 | -0.0247 | 0.6213 | 401 |
| CupVolume_1 | 0.0433 | 0.3893 | 398 |
| Avg_RNFL_1 | -0.0103 | 0.8366 | 401 |
| Sup_RNFL_1 | -0.0031 | 0.9512 | 401 |
| Inf_RNFL_1 | -0.0161 | 0.7482 | 402 |
| Tempo_1 | -0.0165 | 0.7420 | 401 |
| Superior_1 | 0.0109 | 0.8280 | 401 |
| Nasal_1 | -0.0097 | 0.8468 | 402 |
| Inferior_1 | -0.0183 | 0.7148 | 402 |
| RNFL_TU_1 | -0.0519 | 0.3014 | 398 |
| ST_1 | -0.0436 | 0.3836 | 401 |
| SN_1 | 0.0472 | 0.3450 | 402 |
| NU_1 | 0.0074 | 0.8832 | 397 |
| NL_1 | -0.0171 | 0.7329 | 401 |
| IN_1 | -0.0186 | 0.7109 | 398 |
| IT_1 | -0.0068 | 0.8926 | 402 |
| TL_1 | 0.0123 | 0.8066 | 401 |
| TU1_1 | -0.0490 | 0.3270 | 402 |
| TU2_1 | -0.0636 | 0.2080 | 394 |
| ST2_1 | -0.0497 | 0.3219 | 399 |
| ST1_1 | 0.0084 | 0.8673 | 402 |
| SN1_1 | 0.0435 | 0.3874 | 397 |
| SN2_1 | 0.0180 | 0.7196 | 402 |
| NU2_1 | -0.0066 | 0.8956 | 399 |
| NU1_1 | 0.0060 | 0.9050 | 401 |
| NL1_1 | -0.0184 | 0.7139 | 401 |
| NL2_1 | -0.0131 | 0.7938 | 400 |
| IN2_1 | -0.0118 | 0.8134 | 400 |
| IN1_1 | -0.0198 | 0.6931 | 398 |
| IT1_1 | -0.0639 | 0.2013 | 402 |
| IT2_1 | 0.0255 | 0.6125 | 397 |
| TL2_1 | 0.0103 | 0.8364 | 402 |
| TL1_1 | -0.0133 | 0.7903 | 400 |
